# Supplementary material for: Direct electrochemical formation of nanostructured amorphous Co(OH)2on gold electrodes with enhanced activity for the oxygen evolution reaction
Source: Royal Society of Chemistry journal article supplement (doi:10.1039/c5ta09125j), 2015-12-03
Supplement: c5ta09125j1.pdf [file c5ta09125j1.pdf]

## Direct electrochemical formation of nanostructured amorphous $\text{Co}(\text{OH})_2$ on gold electrodes with enhanced activity for the oxygen evolution reaction

Md Abu Sayeed, Tenille Herd and Anthony P. O'Mullane

### Electronic Supplementary Information

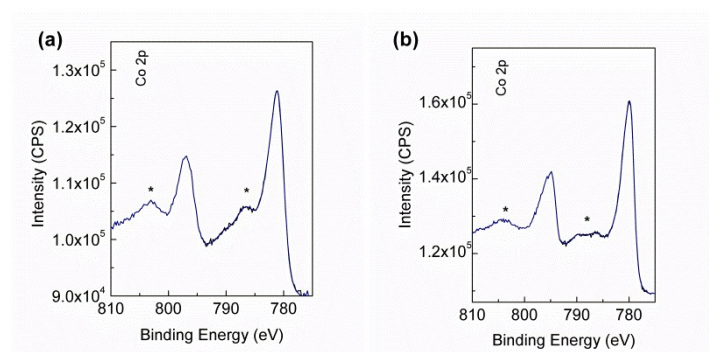

**Figure S1:** XPS spectra of Co 2p for (a) as deposited  $\text{Co}(\text{OH})_2$  on Au and (b) after 5 cycles into the OER region.

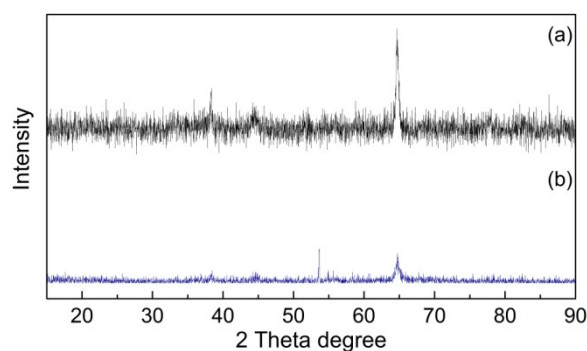

**Figure S2:** GIXRD patterns of amorphous  $\text{Co}(\text{OH})_2$ ; (a) after deposition and (b) after OER on Au substrate.

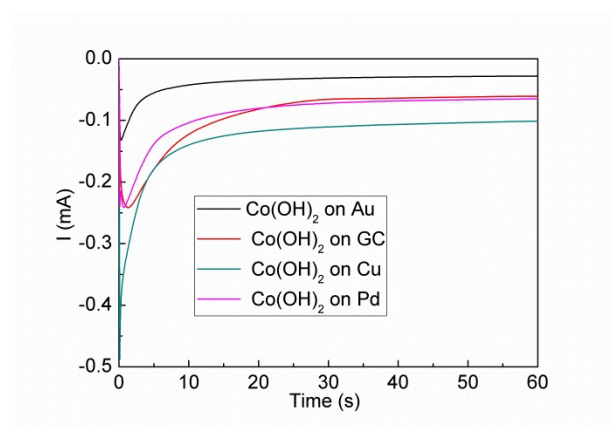

**Figure S3:** Current-time transients for the electrodeposition of  $\text{Co(OH)}_2$  on Au, GC, Pd and Cu electrodes at a potential of  $-0.95$  V in a solution of  $10 \text{ mM Co(NO}_3)_2 \cdot 6\text{H}_2\text{O}$ .

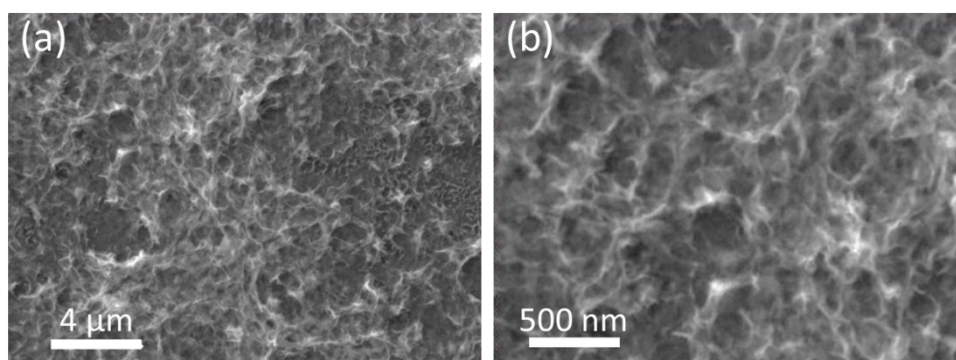

**Figure S4:** SEM images of  $\text{Co(OH)}_2$  electrodeposited film on GC electrode for 60 sec at  $-0.95$  V.

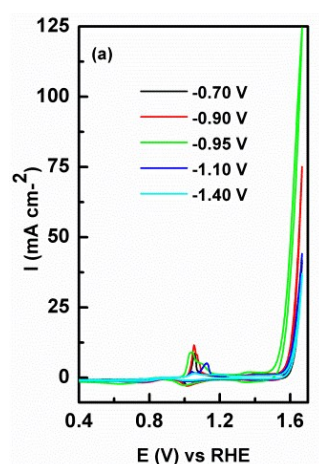

**Figure S5:** OER performance for Au/Co(OH)<sub>2</sub> electrodeposited from 10 mM Co(NO<sub>3</sub>)<sub>2</sub>·6H<sub>2</sub>O at different potentials. Cyclic voltammograms were recorded at 50 mV s<sup>-1</sup> in 1 M NaOH (5<sup>th</sup> cycle is shown).

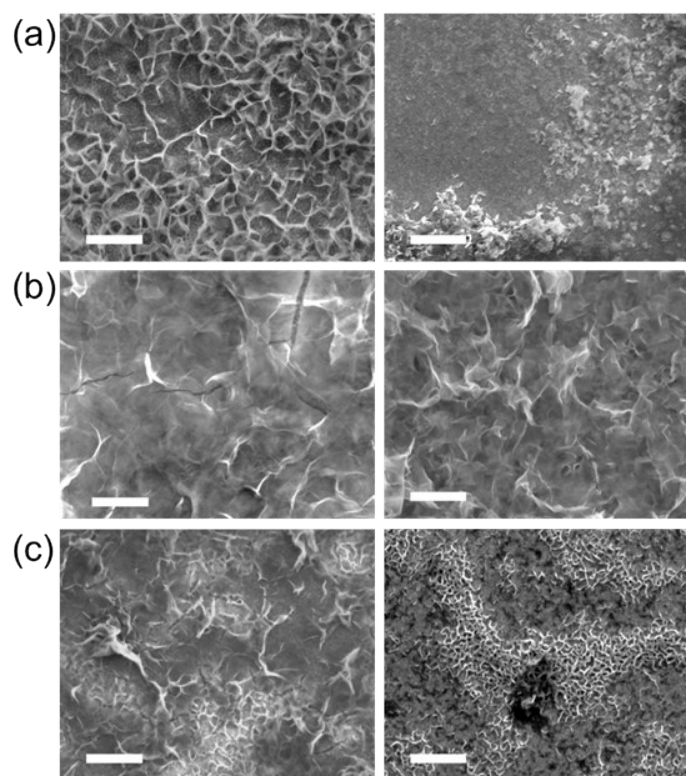

**Figure S6:** SEM images of a Co(OH)<sub>2</sub> electrodeposited film on Au substrate for 60 sec as a function of potential where the applied potential was (a) -0.75 V, (b) -0.95 V and (c) -1.40 V; Co(OH)<sub>2</sub>: as-deposited (left panel), after OER (right panel). Scale bar is 1 μm in each case.

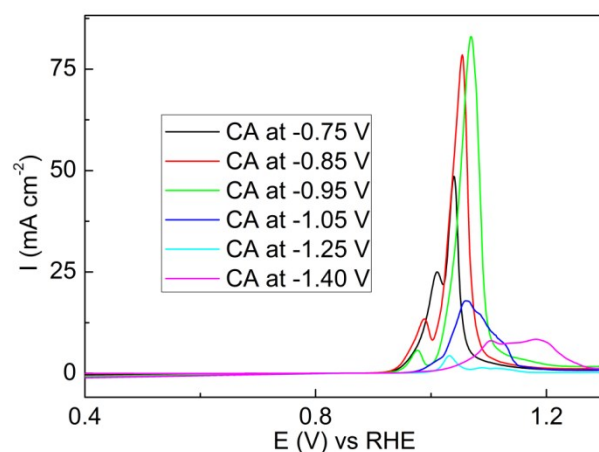

**Figure S7:** Linear sweep voltammograms for electrodeposited  $\text{Co(OH)}_2$  on Au electrode formed at different potentials for 60 sec in 1 M NaOH at a scan rate of  $50 \text{ mV s}^{-1}$ .

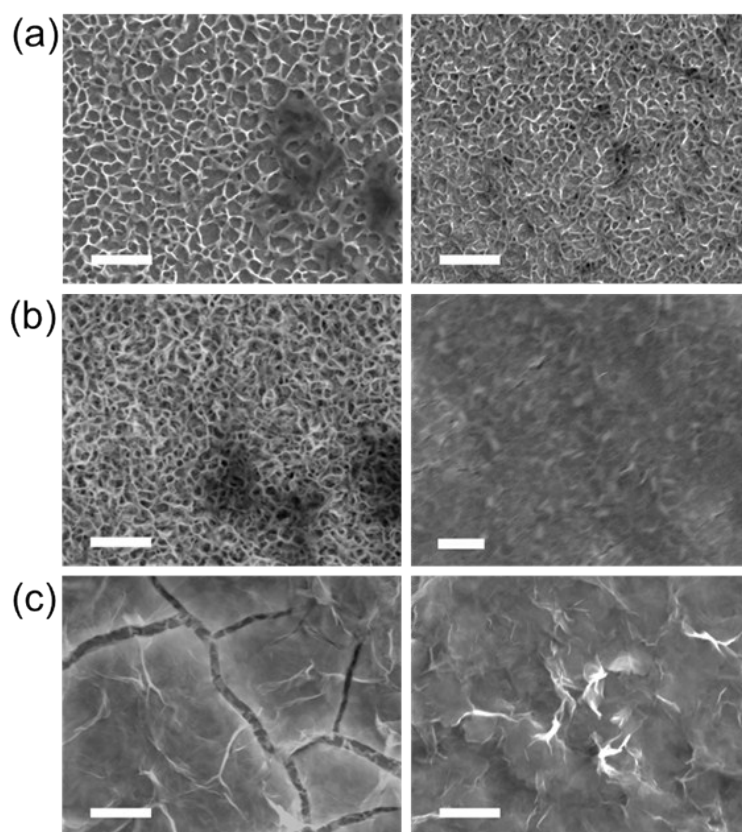

**Figure S8:** SEM images of a  $\text{Co(OH)}_2$  electrodeposited film on Au substrate at  $-0.95 \text{ V}$  as a function of deposition time; (a) 10 sec, (b) 30 sec and (c) 90 sec;  $\text{Co(OH)}_2$ : as-deposited (left panel) and after OER (right panel). Scale bar is  $1 \mu\text{m}$  in each case.

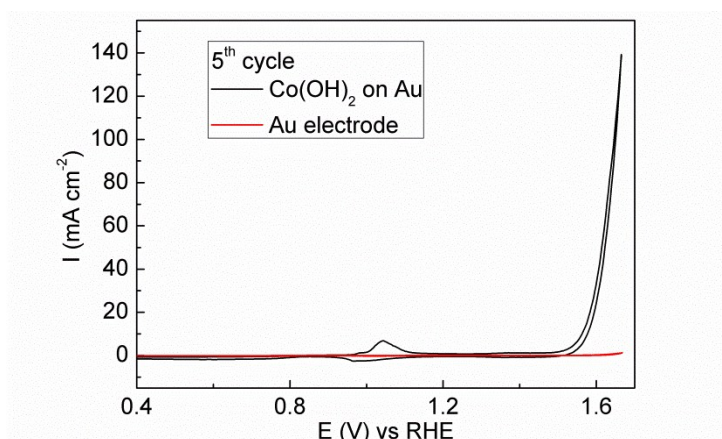

**Figure S9:** OER performance for Au/Co(OH)<sub>2</sub> and Au electrode. Cyclic voltammograms were recorded at 50 mV s<sup>-1</sup> in 1 M NaOH (5<sup>th</sup> cycle is shown).

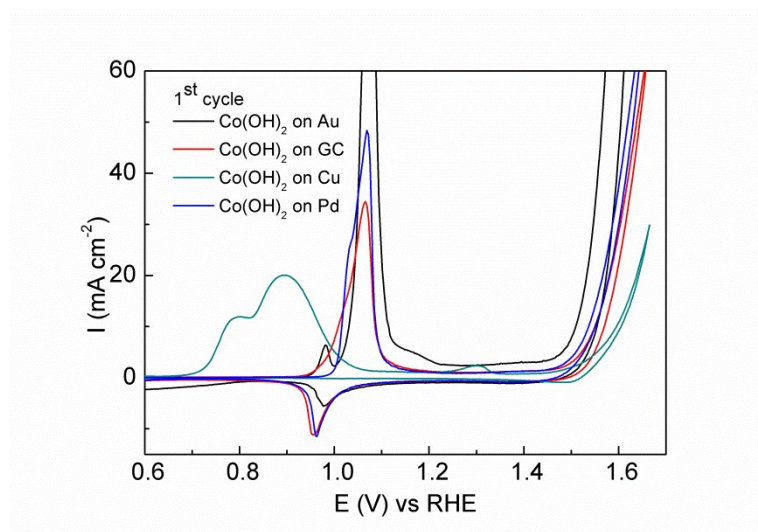

**Figure S10:** Cyclic voltammograms recorded at Co(OH)<sub>2</sub> electrodeposited on Au, GC, Pd and Cu electrodes in 1 M NaOH recorded at 50 mV s<sup>-1</sup> showing a zoomed in section of the data shown in Figure 5a of the main manuscript.



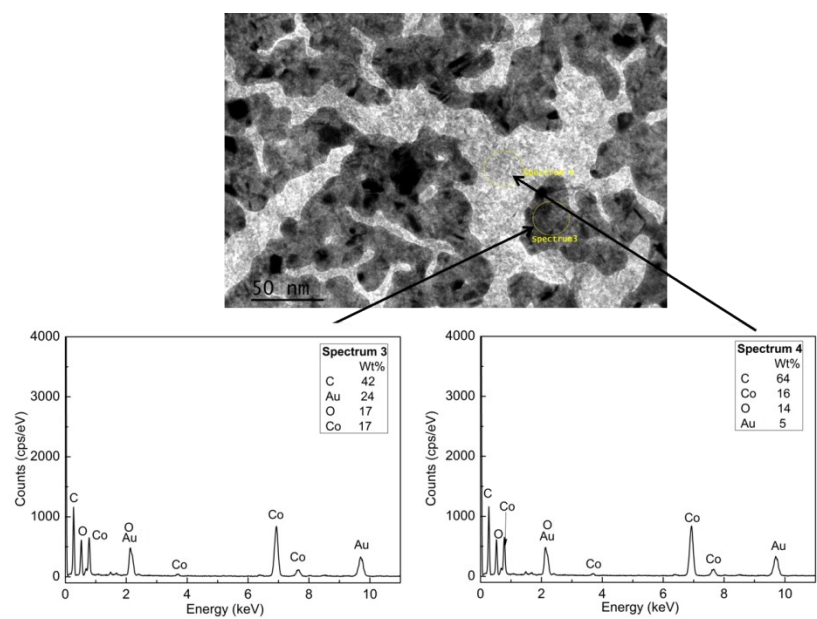

**Figure S11:** EDS spectra of different sites of Co(OH)<sub>2</sub> electrodeposited onto a Au TEM grid post OER.
